# Supplementary material for: Fecal Microbiota and Metabolome of Children with Autism and Pervasive Developmental Disorder Not Otherwise Specified
Source: PLoS One. 2013 Oct 9;8(10):e76993. doi: 10.1371/journal.pone.0076993 (PMC3793965; doi:10.1371/journal.pone.0076993)
Supplement: Table S1 — Volatile organic compounds (VOCs). Concentration (ppm) of VOCs of fecal samples of Pervasive Developmental Disorder Not Otherwise Specified (PDD-NOS), autistic (AD) and healthy (HC) children. (DOC) [file pone.0076993.s003.doc]

**Table S1**. Volatile organic compounds (VOCs). Concentration (ppm) of VOCs of fecal samples of Pervasive Developmental Disorder Not Otherwise Specified (PDD-NOS), autistic (AD) and healthy (HC) children.

| **Chemical class** | **PDD-NOS** | | **AD** | | **HC** | |
| --- | --- | --- | --- | --- | --- | --- |
| Average | | Range | Average | Range | Average | Range |
| Alcohols | | | | | | |
| Ethanol | 2.56b | 0.45-12.35 | 1.49c | 0.38-4.93 | 4.43a | 0.26-44.66 |
| 3-Methyl-1-pentanol | 0.36a | 0.04-1.15 | 0.24b | 0-0.58 | 0.24b | 0-1.01 |
| 3,7-Dimethyl-2,6-octadien-1-ol | 1.90a | 0.02-4.79 | 1.71b | 0.03-10.72 | 1.42c | 0.01-12.21 |
| 1-Pentanol | 0.54a | 0.09-2.46 | 0.45b | 0.07-1.70 | 0.61a | 0.07-2.87 |
| 3-Methyl-2-butanol | 0a | 0 | 0a | 0 | 0.01a | 0-0.12 |
| Heptanol | 0.01a | 0-0.03 | 0.02a | 0-0.17 | 0.01a | 0-0.08 |
| 2-Propyl-1-pentanol | 0.02b | 0.01-0.08 | 0.01c | 0.00-0.04 | 0.03a | 0.01-0.16 |
| 1-[2-Methyl-3-(methylthio) allyl]cyclohex-2-enol | 0.80a | 0.45-0.98 | 0.52b | 0-0.98 | 0.76a | 0.36-1.58 |
| 4-(1,1,3,3-tetramethylbutyl)-Phenol | 0.58a | 0.19-1.68 | 0.58a | 0.18-1.35 | 0.47b | 0.19-0.79 |
| 1-Octanol | 0.01a | 0-0.01 | 0.02a | 0-0.11 | 0.01a | 0-0.02 |
| Phenylethyl alcohol | 0.01a | 0-0.02 | 0.01a | 0-0.04 | 0.01a | 0-0.02 |
| Phenol | 0.20a | 0.01-1.01 | 0.16a | 0.02-1.01 | 0.10b | 0.01-0.83 |
| 4-(1,1-Dimethylethyl)-phenol | 0.18a | 0.06-0.18 | 0.16a | 0.04-0.14 | 0.09b | 0.05-0.13 |
| p-Cresol | 5.23a | 0.48-11.83 | 4.67b | 0.17-21.54 | 3.11c | 0.19-8.34 |

**Table 1S** continued

| **Chemical class** | **PDD-NOS** | | **AD** | | **HC** | |
| --- | --- | --- | --- | --- | --- | --- |
| Average | | Range | Average | Range | Average | Range |
| Total alcohols | 12.40a | / | 10.25c | / | 11.19b | / |
| Aldehydes | | | | | | |
| Octanal | 0.17a | 0-0.64 | 0.02c | 0-0.07 | 0.12b | 0-0.78 |
| Nonanal | 0.04a | 0.02-0.08 | 0.04a | 0.02-0.06 | 0.03b | 0.01-0.08 |
| Benzeneacetaldehyde | 0.04a | 0-0.11 | 0.04a | 0.01-0.08 | 0.03b | 0.01-0.09 |
| Benzaldehyde | 0.11a | 0.02-0.32 | 0.10a | 0.01-0.27 | 0.06b | 0.02-0.15 |
| Total aldehydes | 0.37a | / | 0.20c | / | 0.24b | / |
| Esters | | | | | | |
| Acetic acid methyl ester | 2.00b | 0.93-2.52 | 2.20a | 0.60-4.25 | 1.87b | 0.43-5.84 |
| Acetic acid ethyl ester | 0.64b | 0.04-2.14 | 0.40c | 0.07-0.79 | 0.82a | 0.06-5.43 |
| Propionic acid ethyl ester | 2.06a | 0.10-6.80 | 0.70c | 0.22-2.26 | 1.37b | 0.09-7.45 |
| Propionic acid 2-methylethyl ester | 0.02a | 0-0.06 | 0.01a | 0-0.02 | 0.02a | 0-0.09 |
| Butanoic acid methyl ester | 6.54a | 1.56-14.84 | 5.76b | 1.73-12.71 | 5.30c | 1.75-15.22 |
| Butanoic acid ethyl ester | 3.11a | 0.08-8.22 | 1.11c | 0.25-2.18 | 2.87b | 0.06-16.63 |
| Butanoic acid 3-methylethyl ester | 0.02a | 0-0.13 | 0.01a | 0-0.02 | 0.01a | 0-0.06 |
| Acetic acid butyl ester | 0.19a | 0-0.41 | 0.06c | 0-0.33 | 0.13b | 0-0.79 |

**Table 1S** continued

| **Chemical class** | **PDD-NOS** | | **AD** | | **HC** | |
| --- | --- | --- | --- | --- | --- | --- |
| Average | | Range | Average | Range | Average | Range |
| Pentanoic acid methyl ester | 0.41a | 0.02-2.32 | 0.39a | 0.02-1.89 | 0.25b | 0.01-0.89 |
| Butanoic acid propyl ester | 1.80a | 0.07-9.25 | 0.64c | 0.10-1.55 | 1.70b | 0.07-8.48 |
| Pentanoic acid ethyl ester | 0.76a | 0.01-3.55 | 0.28c | 0.01-1.48 | 0.71b | 0.02-7.58 |
| Heptanoic acid, 1,1-dimethylethyl ester | 0.03b | 0.00-0.07 | 0.03b | 0.00-0.08 | 0.05a | 0.01-0.08 |
| Pentanoic acid 3-methylmethyl ester | 0.02b | 0-0.23 | 0.03a | 0-0.08 | 0.04a | 0-0.15 |
| Butanoic acid butyl ester | 2.59a | 0.15-18.24 | 0.69c | 0.12-2.17 | 1.66b | 0.09-12.12 |
| Butanoic acid hexyl ester | 0.39a | 0.01-1.87 | 0.15b | 0.01-0.89 | 0.41a | 0-4.74 |
| Hexanoic acid ethyl ester | 0.05b | 0-0.35 | 0.02c | 0-0.18 | 0.11a | 0-1.88 |
| Butanoic acid 3-methylbutyl ester | 0.04a | 0-0.15 | 0.04a | 0-0.19 | 0.03b | 0-0.17 |
| Acetic acid hexyl ester | 0a | 0 | 0.01a | 0-0.04 | 0a | 0 |
| Heptanoic acid methyl ester | 0.01a | 0-0.04 | 0a | 0 | 0a | 0 |
| Hexanoic acid propyl ester | 0.01a | 0-0.03 | 0.01a | 0-0.06 | 0.01a | 0-0.08 |
| Pentanoic acid hexyl ester | 0.03a | 0.01-0.18 | 0.03a | 0-0.17 | 0.02b | 0-0.14 |
| Heptanoic acid ethyl ester | 0.02b | 0-0.19 | 0.01b | 0-0.09 | 0.04a | 0-0.70 |
| Propionic acid hexyl ester | 0.01a | 0-0.03 | 0.01a | 0-0.06 | 0.01a | 0.01-0.03 |
| Hexanoic acid 2-methylpropyl ester | 0a | 0 | 0.01a | 0-0.06 | 0a | 0 |
| Heptanoic acid 1-methylethyl ester | 0.05a | 0.03-0.06 | 0.05a | 0.03-0.14 | 0.04b | 0.02-0.07 |

**Table 1S** continued

| **Chemical class** | **PDD-NOS** | | **AD** | | **HC** | |
| --- | --- | --- | --- | --- | --- | --- |
| Average | | Range | Average | Range | Average | Range |
| Benzoic acid hexadecyl ester | 0.10a | 0.05-0.08 | 0.10a | 0.04-0.08 | 0.06b | 0.04-0.16 |
| Phthalic acid diethyl ester | 0a | 0 | 0.01a | 0-0.01 | 0.016a | 0-0.03 |
| Phthalic acid methyl neopentyl ester | 0.20a | 0.11-0.25 | 0.19a | 0.07-0.23 | 0.16b | 0.10-0.26 |
| Total esters | 21.10a | / | 12.95c | / | 17.70b | / |
| Sulphur compounds | | | | | | |
| Carbon disulphide | 64.09c | 37.58-84.57 | 64.90a | 41.63-81.25 | 64.75b | 10.76-128.68 |
| Dimethyl disulphide | 2.44b | 0.27-8.87 | 2.08c | 0.03-6.88 | 3.07a | 0.08-7.79 |
| Dimethyl trisulphide | 0.04b | 0.01-0.13 | 0.05b | 0.02-0.11 | 0.06a | 0.01-0.16 |
| Total sulphur compounds | 66.57c | / | 67.03b | / | 67.88a | / |
| Hydrocarbons | | | | | | |
| Octane | 0.01a | 0-0.02 | 0.02a | 0.01-0.04 | 0.02a | 0.01-0.07 |
| Benzene | 2.37a | 0.75-3.91 | 2.01c | 0.45-5.74 | 2.18b | 0.54-5.94 |
| Trichloromethane | 1.19b | 0.23-2.99 | 1.15b | 0.26-2.58 | 1.44a | 0.27-7.15 |
| Toluene | 1.15a | 0.45-2.16 | 1.24a | 0.10-3.39 | 1.09b | 0.13-3.66 |
| O-xylene | 0.28a | 0.11-0.58 | 0.28a | 0.09-0.70 | 0.24b | 0.05-0.52 |
| Isopentyl alcohol, formate | 0.04a | 0.01-0.10 | 0.02c | 0.01-0.04 | 0.03b | 0.01-0.16 |
| 4-Hydroxy-3-methyl-2-butanonene | 0.02a | 0-0.03 | 0.02a | 0-0.07 | 0.01a | 0-0.04 |
| 1-Methyl-2-(1-methylethyl)-benzene | 0.53b | 0.03-1.71 | 1.12a | 0.02-4.93 | 0.46c | 0.02-3.60 |

**Table 1S** continued

| **Chemical class** | **PDD-NOS** | | **AD** | | **HC** | |
| --- | --- | --- | --- | --- | --- | --- |
| Average | | Range | Average | Range | Average | Range |
| 2,2,4,6,6-Pentamethyl-3-heptene | 1.01a | 0.49-1.98 | 0.95a | 0.46-1.58 | 0.88b | 0.41-1.66 |
| 6-Methyl-1-heptene | 0.47a | 0.11-1.67 | 0.37b | 0.07-1.75 | 0.34c | 0.10-1.60 |
| 1,4-Bis-(1,1-dimethylethyl)-benzene | 2.01b | 0.60-3.33 | 2.70a | 0.63-6.72 | 1.74c | 0.61-4.42 |
| 2-Pentyl-thiophene | 0.01a | 0.01-0.01 | 0.01a | 0-0.01 | 0.01a | 0-0.01 |
| Total hydrocarbons | 9.09b | / | 9.89a | / | 8.44c | / |
| Ketones | | | | | | |
| 2-Butanone | 5.59b | 1.19-19.79 | 5.21b | 0.89-14.35 | 10.59a | 1.02-90.26 |
| Methyl isobutyl ketone | 0.10a | 0.06-0.11 | 0.11a | 0.08-0.13 | 0.05b | 0.03-0.14 |
| 3-Hexanone | 0.07b | 0.01-0.28 | 0.05b | 0-0.24 | 0.10a | 0-0.50 |
| 4-Heptanone | 0.03b | 0.01-0.21 | 0.03b | 0.01-0.06 | 0.05a | 0.01-0.53 |
| 2,6-Dimethyl-4-heptanone | 1.46a | 0.76-2.42 | 1.49a | 0.93-2.34 | 1.41b | 0.93-2.20 |
| 1-Phenyl-2-hexanone | 0.09b | 0.04-0.13 | 0.32a | 0.05-1.38 | 0.06c | 0.03-0.14 |
| Total ketones | 7.34b | / | 7.22b | / | 12.25a | / |
| Short and medium chain fatty acids | | | | | | |
| Acetic acid | 0.38a | 0.07-1.17 | 0.44a | 0.06-1.14 | 0.33b | 0.05-1.33 |
| Propionic acid | 0.35a | 0.03-1.15 | 0.37a | 0.06-0.86 | 0.31b | 0.01-1.00 |
| Butanoic acid | 2.92b | 0.21-10.08 | 1.77c | 0-4.14 | 2.62a | 0.04-16.80 |
| 3-Methylbutanoic acid | 0.04b | 0-0.09 | 0.04b | 0.01-0.11 | 0.05a | 0-0.21 |

**Table 1S** continued

| **Chemical class** | **HC** | | **AD** | | **PDD-NOS** | |
| --- | --- | --- | --- | --- | --- | --- |
| Average | | Range | Average | Range | Average | Range |
| 2-Methylbutanoic acid | 0.14b | 0.02-0.33 | 0.14b | 0.03-0.26 | 0.16a | 0.02-0.65 |
| Pentanoic acid | 0.53b | 0.06-2.05 | 0.45b | 0.05-1.55 | 0.62a | 0.03-2.65 |
| Hexanoic acid | 0.04b | 0-0.19 | 0.04b | 0-0.27 | 0.07a | 0-0.50 |
| Heptanoic acid | 0.01a | 0-0.04 | 0.01a | 0-0.05 | 0.01a | 0-0.08 |
| Octanoic acid | 0a | 0 | 0.01a | 0-0.04 | 0a | 0 |
| Total short and medium chain fatty acids | 4.41a | / | 3.27c | / | 4.17b | / |
| Terpenes | | | | | | |
| (-)-Cis-Carene | 0.87a | 0.09-1.60 | 0.76b | 0.29-1.57 | 0.71c | 0.05-1.32 |
| Limonene | 0.32a | 0-1.09 | 0.09c | 0.01-1.29 | 0.21b | 0-1.82 |
| Copaene | 0a | 0 | 0.01a | 0-0.02 | 0.01a | 0-0.03 |
| Menthol | 0.02a | 0-0.12 | 0a | 0 | 0.02a | 0-0.13 |
| Total terpenes | 1.22a | / | 0.86b | / | 0.94b | / |
| Indoles | | | | | | |
| Indole | 0.74a | 0.15-2.25 | 0.46b | 0.11-1.08 | 0.31c | 0.10-1.36 |
| 3-Methylindole | 0.24b | 0.01-0.87 | 0.83a | 0.01-7.93 | 0.14c | 0.01-1.08 |
| Total indoles | 0.98b | / | 1.29a | / | 0.45c | / |
| Others | | | | | | |
| Furanone A | 2.76a | 1.72-3.31 | 2.49b | 1.57-2.94 | 2.33b | 1.02-6.02 |

Data are the means of three independent experiments (n = 3) for each children. a–cValues within a row with different superscript letters are significantly different (p < 0.05).
